# Supplementary material for: SH005S7 Overcomes Primary and Acquired Resistance of Non‐Small Cell Lung Cancer by Combined MET/EGFR/HER3 Inhibition
Source: Hindawi journal article supplement (doi:10.1155/2022/1840541), 2022-01-01

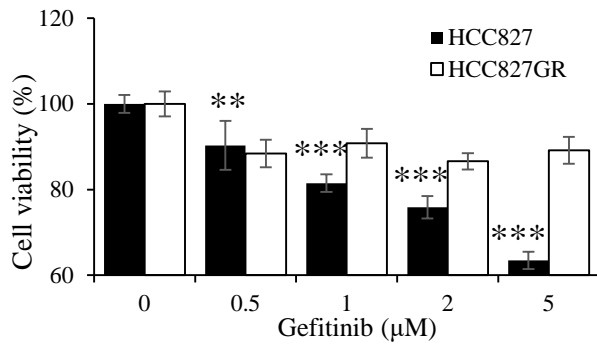

(a)

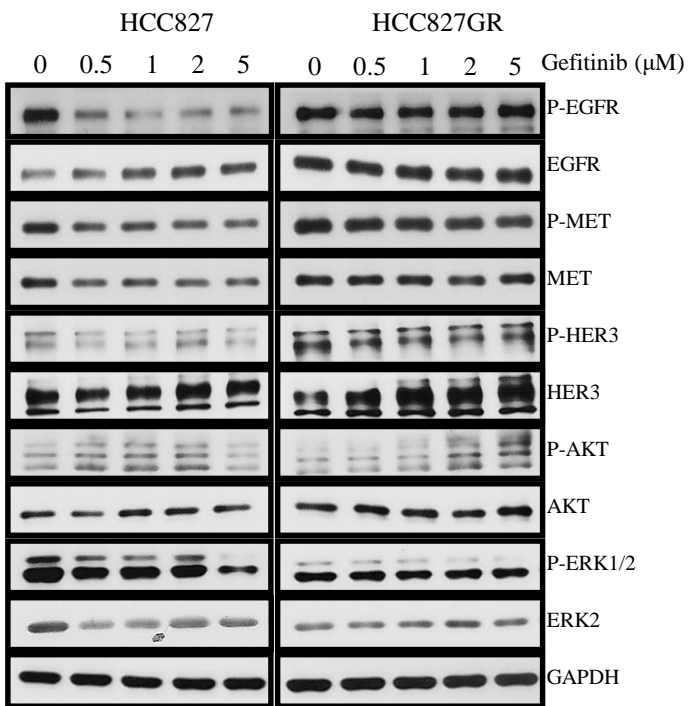

(b)

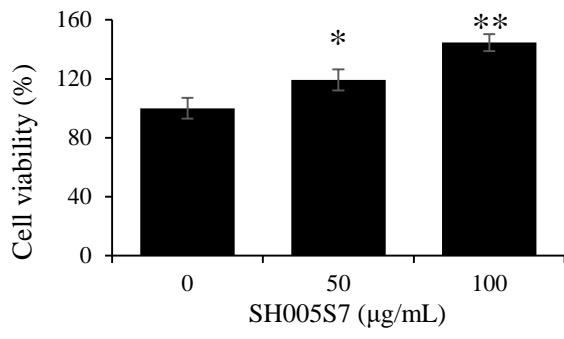

Supplement: f1 [file 1840541.f1.pdf]
